# High Frequency of $V\alpha 24^+ V\beta 11^+$ T-Cells Observed in Type 1 Diabetes

YOICHI OIKAWA, MD<sup>1</sup>  
AKIRA SHIMADA, MD<sup>1</sup>  
SATORU YAMADA, MD<sup>1</sup>  
YOSHIKO MOTOHASHI, MD<sup>1</sup>

YOSHINORI NAKAGAWA, MD<sup>1</sup>  
JUN-ICHIRO IRIE, MD<sup>1</sup>  
TARO MARUYAMA, MD<sup>2</sup>  
TAKAO SARUTA, MD<sup>1</sup>

**OBJECTIVE** — Natural killer T-cells (NKT cells) are believed to play an important role in the regulation of immune response, and a numerical and functional deficit of NKT cells has been reported to be associated with the pathogenesis of autoimmune diseases. Thus far, it has been shown that subjects with type 1 diabetes have a lower frequency of NKT cells than nondiabetic subjects. In this study, we measured the frequency of peripheral  $V\alpha 24^+ V\beta 11^+$  T-cells, which include human NKT cells, in Japanese diabetic patients.

**RESEARCH DESIGN AND METHODS** — Peripheral blood samples were obtained from 164 Japanese diabetic patients and 67 healthy subjects. The diabetic patients were classified into four categories as follows: islet-associated autoantibody-positive ( $Ab^+$ ) and -negative ( $Ab^-$ ) classic type 1 diabetes, latent autoimmune diabetes in adults (LADA), and type 2 diabetes. We measured the frequency of peripheral  $V\alpha 24^+ V\beta 11^+ CD3^+$  triple-positive cells.

**RESULTS** — Unexpectedly, a higher frequency of  $V\alpha 24^+ V\beta 11^+$  T-cells was observed in  $Ab^+$  and  $Ab^-$  patients compared with LADA patients ( $P = 0.0294$  and  $P = 0.0021$ ), type 2 diabetic patients ( $P < 0.0001$  and  $P < 0.0001$ ), and healthy subjects ( $P = 0.0046$  and  $P = 0.0001$ ). Moreover, an inverse correlation between  $V\alpha 24^+ V\beta 11^+$  T-cell frequency and disease duration was observed in  $Ab^+$  ( $\rho = -0.455$ ;  $P = 0.0023$ ) and  $Ab^-$  ( $\rho = -0.432$ ;  $P = 0.0162$ ) patients.

**CONCLUSIONS** — Our findings indicate that a high frequency of  $V\alpha 24^+ V\beta 11^+$  T-cells is a unique finding in recent-onset classic type 1 diabetes, and measurement of  $V\alpha 24^+ V\beta 11^+$  T-cell frequency may be useful to assess the disease activity of classic type 1 diabetes.

*Diabetes Care* 25:1818–1823, 2002

Most type 1 diabetes is now considered to be a T-cell-mediated autoimmune disease. In the nonobese diabetic (NOD) mouse, which is an excellent model of type 1 diabetes, it was previously reported that a shift from a T-helper 2 (Th2)-dominant to a Th1-dominant T-cell response is correlated with the onset of type 1 diabetes (1). This

shift might be associated with the failure of regulatory cells, possibly involving  $CD45RB^{low} CD4^+$  cells (1), Th2 cells, and natural killer T-cells (NKT cells) (2).

NKT cells share characteristics of both conventional T-cells and NK cells. Some human NKT cells express an extremely restricted T-cell receptor (TCR) repertoire, including an invariant  $V\alpha 24$

chain preferentially paired with a  $V\beta 11$  chain, together with an NK cell receptor (NKR-P1A) (3–7). NKT cells specifically recognize the glycolipid  $\alpha$ -galactosylceramide ( $\alpha$ -GalCer), which is isolated as a natural product from marine sponges (8,9), and this recognition requires expression of major histocompatibility complex (MHC) class I-like molecule CD1d (10–12). Because of the capacity to produce large amounts of interferon- $\gamma$  (IFN- $\gamma$ ) and interleukin (IL)-4 upon activation, these cells are believed to play an important role in the regulation of immune response (7,13,14).

A numerical and functional deficit of NKT cells (including  $V\alpha 24^+ V\beta 11^+$  T-cells in humans) has been reported to be associated with the pathogenesis of autoimmune diseases in autoimmune-prone mice such as SJL mice (15) and MRL-lpr/lpr mice (16), and also in patients with systemic sclerosis (17,18), systemic lupus erythematosus (18,19), rheumatoid arthritis (18,20), and other autoimmune diseases (18). In NOD mice, a numerical and functional deficit of NKT cells is involved in the pathogenesis of diabetes through the breakdown of autoimmune regulatory systems (21–23), and the prevention of diabetes has been observed by adoptive transfer of  $CD4^- CD8^-$  TCR  $\alpha/\beta^+$  thymocytes, which are characteristic of mouse NKT cells (24). Type 1 diabetic patients were recently reported to have a lower frequency of NKT cells, which are deficient in IL-4 secretion (25,26). These findings indicate that the pathogenesis of type 1 diabetes, as well as other autoimmune diseases (18), is associated with a numerical and functional deficit of NKT cells.

In the present study, we measured the frequency of peripheral  $V\alpha 24^+ V\beta 11^+$  T-cells, some of which are considered to be human NKT cells, in Japanese type 1 diabetic patients. Contrary to our expectations, a significantly higher frequency of  $V\alpha 24^+ V\beta 11^+$  T-cells was observed in patients with classic type 1 diabetes compared with latent autoimmune diabetes in adults (LADA) (27), type 2 diabetes, and healthy subjects. Moreover, the frequency was inversely correlated with disease du-

From the <sup>1</sup>Department of Internal Medicine, Keio University School of Medicine, Tokyo, Japan; and the <sup>2</sup>Department of Internal Medicine, Saitama Social Insurance Hospital, Saitama, Japan.

Address correspondence and reprint requests to Yoichi Oikawa, MD, Department of Internal Medicine, Division of Endocrinology and Metabolism, Keio University School of Medicine, 35 Shinanomachi, Shinjuku-ku, Tokyo 160-8582, Japan. E-mail: y-oikawa@mvc.biglobe.ne.jp.

Received for publication 1 February 2002 and accepted in revised form 27 June 2002.

**Abbreviations:**  $\alpha$ -GalCer,  $\alpha$ -galactosylceramide;  $Ab^+$ , islet-associated autoantibody positive;  $Ab^-$ , islet-associated autoantibody negative; FITC, fluorescein isothiocyanate; GADA, glutamic acid decarboxylase antibody; IA2A, insulinoma-associated protein-2 antibody; IFN- $\gamma$ , interferon- $\gamma$ ; IL, interleukin; IP-10, interferon-inducible protein-10; LADA, latent autoimmune diabetes in adults; MHC, major histocompatibility complex; NKT cells, natural killer T-cells; PC5, phycoerythrin-cyanine 5; PE, phycoerythrin; TCR, T-cell receptor; Th, T helper.

A table elsewhere in this issue shows conventional and Système International (SI) units and conversion factors for many substances.

ration in classic type 1 diabetes. These findings suggest that a higher frequency of peripheral  $V\alpha 24^+ V\beta 11^+$  T-cells is a unique finding in recent-onset classic type 1 diabetes, but not in any other autoimmune diseases, and measurement of  $V\alpha 24^+ V\beta 11^+$  T-cell frequency may be useful to assess the disease activity of classic type 1 diabetes.

## RESEARCH DESIGN AND METHODS

### Patients

Peripheral blood samples were obtained from 164 Japanese diabetic patients and 67 healthy subjects (39 men, 28 women; aged  $40.5 \pm 14.3$  years) with informed consent for use in this study. The diabetic patients were classified into three categories: classic type 1 diabetes ( $n = 78$ ; 41 men, 37 women; aged  $40.6 \pm 17.1$  years; disease duration  $4.0 \pm 4.5$  years;  $HbA_{1c}$   $8.4 \pm 1.9\%$ ), LADA (27) ( $n = 26$ ; 19 men, 7 women; aged  $51.3 \pm 12.1$  years; disease duration  $6.7 \pm 5.6$  years;  $HbA_{1c}$   $8.4 \pm 1.9\%$ ), and type 2 diabetes ( $n = 60$ ; 33 men, 27 women; aged  $61.3 \pm 10.1$  years; disease duration  $9.8 \pm 6.7$  years;  $HbA_{1c}$   $7.1 \pm 1.4\%$ ). The diagnosis of classic type 1 diabetes was based on the criteria of the American Diabetes Association for type 1 diabetes, with pancreatic  $\beta$ -cell destruction as the primary cause of the disorder and a tendency toward ketoacidosis (28,29), irrespective of islet-associated autoantibody positivity. Briefly, type 1 diabetic patients were diagnosed on the basis of classic presentation of acute abrupt onset of symptoms (polyuria, polydipsia, body weight loss, and so on) with diabetic ketosis (or ketoacidosis) due to both sustained hyperglycemia and a defect of residual insulin secretion; in fact, serum C-peptide levels were  $0.35 \pm 0.07$  ng/ml in classic type 1 diabetes near the time of diagnosis in this study. Moreover, we measured glutamic acid decarboxylase antibody (GADA) and/or insulinoma-associated protein-2 antibody (IA2A) as islet-associated autoantibodies, as previously described (30), and if either of the antibodies was detected, the patient was classified as islet-associated autoantibody positive. Therefore, classic type 1 diabetes consists of both islet-associated autoantibody-positive patients ( $Ab^+$ ;  $n = 46$ ) and -negative patients ( $Ab^-$ ;  $n = 32$ ). LADA

patients were defined as adult diabetic patients who were positive for GADA and/or IA2A and who did not require insulin therapy for at least 12 months after the diagnosis of diabetes but who ultimately progressed to insulin dependence (27).

### Immunostaining and flow cytometry

Heparinized peripheral blood (100  $\mu$ l) was placed in 5-ml polystyrene round-bottom tubes (Becton Dickinson, Franklin Lakes, NJ). Each sample was incubated with 3  $\mu$ l human phycoerythrin-cyanine 5 (PC5)-conjugated CD3 antibody (UCHT1, mouse IgG1; Immunotech, Marseille, France), 4  $\mu$ l human fluorescein isothiocyanate (FITC)-conjugated  $V\alpha 24$  antibody (C15, mouse IgG1; Immunotech), and 4  $\mu$ l human phycoerythrin (PE)-conjugated  $V\beta 11$  antibody (C21, mouse IgG2a; Immunotech) simultaneously on ice for 20 min. To exclude the possibility of nonspecific staining in this system, mouse IgG1-FITC (679.1Mc7; Immunotech) and mouse IgG2a-PE (U7.27; Immunotech) were used as isotype controls. After lysing erythrocytes, the samples were vortexed gently and incubated at room temperature for another 10 min. After centrifuging the tube at 450g for 5 min, the supernatant was removed, and the cells were washed with 0.1% BSA-PBS. The prepared cells were analyzed using a three-color flow cytometer, Epics Altra (Coulter). For enumeration of  $V\alpha 24^+ V\beta 11^+ CD3^+$  triple-positive cells, at least 100,000 events were analyzed. After the lymphocytes were gated by forward scatter and side scatter, at least 25,000 counts of  $CD3^+$  cells, which were identified by gating cells stained with human CD3 antibody-PC5, were analyzed. Then, we counted the number of  $V\alpha 24^+ V\beta 11^+ CD3^+$  triple-positive cells. The frequency of  $V\alpha 24^+ V\beta 11^+ CD3^+$  triple-positive cells was shown as a percentage of  $CD3^+$  cells analyzed.

### Statistical analysis

Results are presented as means  $\pm$  SE. Differences in  $V\alpha 24^+ V\beta 11^+$  T-cell frequency were analyzed using the Bonferroni/Dunn test or Mann-Whitney U test for nonparametric unpaired observations. Differences in patient age were analyzed using the Kruskal-Wallis test for nonparametric unpaired observations. The correlation between  $V\alpha 24^+ V\beta 11^+$

T-cell frequency and disease duration (or age) was analyzed by Spearman's rank-order correlation test. Multiple regression analysis was used to evaluate the association among  $V\alpha 24^+ V\beta 11^+$  T-cell frequency, disease duration, and patient age.

## RESULTS

### High frequency of $V\alpha 24^+ V\beta 11^+$ T-cells observed in type 1 diabetes

NKT cells are now considered to be phenotypically diverse and complicated (5,31); therefore, it is difficult to accurately define the phenotype of NKT cells. Recently, some investigators reported that human NKT cells express a restricted TCR repertoire including an invariant  $V\alpha 24$  paired with  $V\beta 11$  (5,18,31–33), and they clonally expanded both in vivo (34) and in vitro in the presence of  $\alpha$ -GalCer (35–37). Moreover, Poulton et al. (32) recently demonstrated that the combination of  $V\alpha 24$  antibody and  $V\beta 11$  antibody is an excellent surrogate NKT cell marker, comparable to CD1d tetramers loaded with  $\alpha$ -GalCer. Thus, in this study, we measured the frequency of peripheral  $V\alpha 24^+ V\beta 11^+ CD3^+$  triple-positive cells as a representative of human NKT cells. The frequency was expressed as percentage of  $CD3^+$  cells analyzed.

Unlike the findings of several recent studies (21,22,25), it is intriguing that the frequency of  $V\alpha 24^+ V\beta 11^+$  T-cells in the peripheral blood of Japanese type 1 diabetic patients overall (including classic type 1 diabetes and LADA,  $0.112 \pm 0.012\%$ ) was significantly higher than that in patients with type 2 diabetes ( $0.041 \pm 0.006\%$ ;  $P < 0.0001$ ) and healthy subjects ( $0.065 \pm 0.009\%$ ;  $P = 0.0019$ ). We then divided type 1 diabetic patients into the following two groups: classic type 1 diabetes (both  $Ab^+$  and  $Ab^-$ ) and LADA. There was a significantly higher frequency of  $V\alpha 24^+ V\beta 11^+$  T-cells in classic type 1 diabetes ( $0.127 \pm 0.015\%$ ) than in LADA patients ( $0.066 \pm 0.010\%$ ;  $P = 0.0043$ ), type 2 diabetic patients ( $P < 0.0001$ ), and healthy subjects ( $P < 0.0001$ ). However, there were no significant differences among LADA patients, type 2 diabetic patients, and healthy subjects. A difference in the frequency of  $CD3^+$  cells among the groups was not observed (data not shown).

Moreover, we divided classic type 1 diabetic patients into the following two

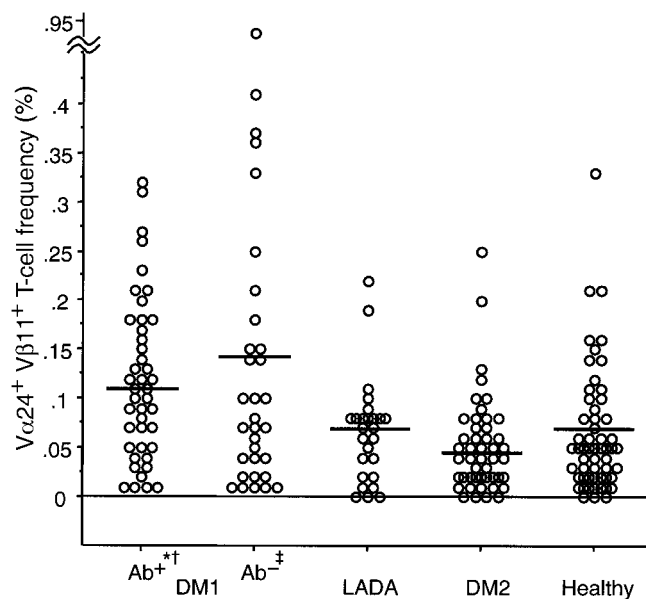

**Figure 1**—Peripheral V $\alpha$ 24<sup>+</sup> V $\beta$ 11<sup>+</sup> T-cell frequency in classic type 1 diabetes (DM1), LADA, type 2 diabetes (DM2), and healthy subjects. Peripheral V $\alpha$ 24<sup>+</sup> V $\beta$ 11<sup>+</sup> T-cells were increased in Ab<sup>+</sup> and Ab<sup>−</sup> type 1 diabetic patients compared with LADA patients, type 2 diabetic patients, and healthy subjects. Vertical lines indicate mean of V $\alpha$ 24<sup>+</sup> V $\beta$ 11<sup>+</sup> T-cell frequency. \* $P < 0.005$  (vs. type 2 diabetic patients and healthy subjects), † $P < 0.03$  (vs. LADA patients), ‡ $P < 0.003$  (vs. LADA patients, type 2 diabetic patients, and healthy subjects).

groups: islet-associated autoantibody (GADA and/or IA2A) positive (Ab<sup>+</sup>;  $n = 46$ ) and negative (Ab<sup>−</sup>;  $n = 32$ ). As shown in Fig. 1, a higher frequency of V $\alpha$ 24<sup>+</sup> V $\beta$ 11<sup>+</sup> T-cells was similarly observed in the Ab<sup>+</sup> ( $0.116 \pm 0.012\%$ ) and Ab<sup>−</sup> ( $0.142 \pm 0.033\%$ ) groups compared with LADA patients ( $P = 0.0294$  and  $P = 0.0021$ , respectively), type 2 diabetic patients ( $P < 0.0001$  and  $P < 0.0001$ , respectively), and healthy subjects ( $P = 0.0046$  and  $P = 0.0001$ , respectively). However, there was no significant difference between Ab<sup>+</sup> and Ab<sup>−</sup> classic type 1 diabetic patients. Thus a higher frequency of peripheral V $\alpha$ 24<sup>+</sup> V $\beta$ 11<sup>+</sup> T-cells was observed in classic type 1 diabetes, irrespective of the positivity of islet-associated autoantibodies. To assess the reproducibility of our assay, the measurement of V $\alpha$ 24<sup>+</sup> V $\beta$ 11<sup>+</sup> T-cell frequency was repeated at an interval of 3–6 months in the same subjects and then was compared with the first result. As previously reported by Poulton et al. (32), there was no significant difference in the V $\alpha$ 24<sup>+</sup> V $\beta$ 11<sup>+</sup> T-cell frequency at such an interval, irrespective of metabolic controls (blood glucose level and glycohemoglobin) (data not shown).

#### Correlation between V $\alpha$ 24<sup>+</sup> V $\beta$ 11<sup>+</sup> T-cell frequency and disease duration in classic type 1 diabetes

It is generally considered that higher disease (insulinitis) activity is expected in type 1 diabetes with shorter disease duration (38), because a severe  $\beta$ -cell mass reduction is suspected in cases of established (long-standing) type 1 diabetes. To assess whether the frequency of V $\alpha$ 24<sup>+</sup> V $\beta$ 11<sup>+</sup> T-cells in peripheral blood reflects disease activity in type 1 diabetes, we investigated the correlation between V $\alpha$ 24<sup>+</sup> V $\beta$ 11<sup>+</sup> T-cell frequency and disease duration. Classic type 1 diabetic patients were divided into the following four groups: recent-onset (disease duration  $< 3$  years) Ab<sup>+</sup> ( $n = 26$ ), recent-onset Ab<sup>−</sup> ( $n = 19$ ), established (disease duration  $\geq 3$  years) Ab<sup>+</sup> ( $n = 20$ ), and established Ab<sup>−</sup> ( $n = 13$ ). We previously reported that a significant difference of serum interferon-inducible protein-10 (IP-10) level, which presumably reflects the disease (insulinitis) activity in type 1 diabetes, was observed between disease duration  $< 3$  years and  $\geq 3$  years in type 1 diabetes (38). As a result, recent-onset Ab<sup>+</sup> patients showed a significantly higher V $\alpha$ 24<sup>+</sup> V $\beta$ 11<sup>+</sup> T-cell frequency than established Ab<sup>+</sup> patients ( $0.143 \pm 0.017\%$  vs.  $0.081 \pm$

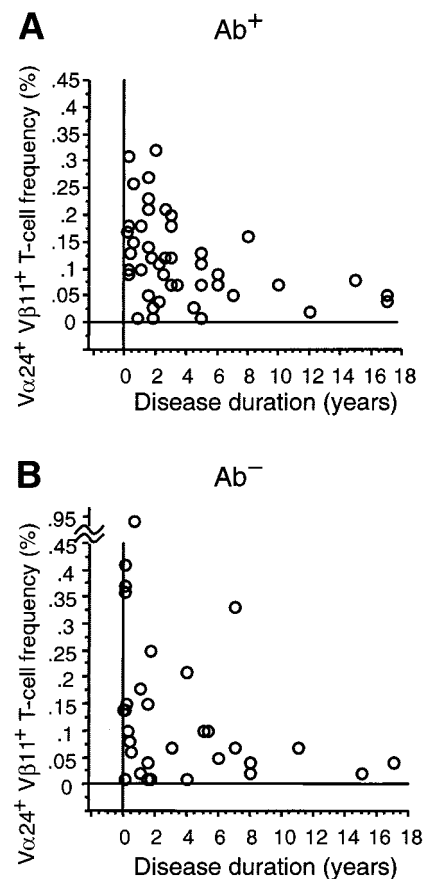

**Figure 2**—Correlation between V $\alpha$ 24<sup>+</sup> V $\beta$ 11<sup>+</sup> T-cell frequency and disease duration in Ab<sup>+</sup> and Ab<sup>−</sup> classic type 1 diabetes. An inverse correlation between V $\alpha$ 24<sup>+</sup> V $\beta$ 11<sup>+</sup> T-cell frequency and disease duration was observed in each Ab<sup>+</sup> ( $\rho = -0.455$ ,  $P = 0.0023$ ) and Ab<sup>−</sup> ( $\rho = -0.432$ ,  $P = 0.0162$ ) classic type 1 diabetic patient.

$0.013\%$ ;  $P = 0.0075$ ), and recent-onset Ab<sup>−</sup> patients also showed a significantly higher V $\alpha$ 24<sup>+</sup> V $\beta$ 11<sup>+</sup> T-cell frequency than established Ab<sup>−</sup> patients ( $0.191 \pm 0.050\%$  vs.  $0.072 \pm 0.023\%$ ;  $P = 0.0474$ ). Moreover, an inverse correlation between V $\alpha$ 24<sup>+</sup> V $\beta$ 11<sup>+</sup> T-cell frequency and disease duration was observed in Ab<sup>+</sup> ( $\rho = -0.455$ ;  $P = 0.0023$ ) and Ab<sup>−</sup> ( $\rho = -0.432$ ;  $P = 0.0162$ ) classic type 1 diabetes (Fig. 2), but not in LADA or type 2 diabetes.

When we combined the data of V $\alpha$ 24<sup>+</sup> V $\beta$ 11<sup>+</sup> T-cell frequency in Ab<sup>+</sup> and Ab<sup>−</sup> classic type 1 diabetic patients and similarly analyzed them, recent-onset (Ab<sup>+</sup> and Ab<sup>−</sup> combined) classic type 1 diabetic patients showed a significantly higher V $\alpha$ 24<sup>+</sup> V $\beta$ 11<sup>+</sup> T-cell frequency than those with established (Ab<sup>+</sup> and Ab<sup>−</sup> com-



**Table 1—Multiple regression analysis of relation among  $V\alpha 24^+$   $V\beta 11^+$  T-cell frequency, disease duration, and age in classic type 1 diabetes**

| Variable                                      | Parameter        | Standard coefficient | t value | Significance (P) | r                      |
|-----------------------------------------------|------------------|----------------------|---------|------------------|------------------------|
| $V\alpha 24^+$ $V\beta 11^+$ T-cell frequency | Disease duration | −0.311               | −2.799  | 0.0066           | 0.341 ( $P = 0.0109$ ) |
|                                               | Age              | −0.103               | −0.930  | NS               |                        |

bined) classic type 1 diabetes ( $0.165 \pm 0.022\%$  vs.  $0.069 \pm 0.011\%$ ;  $P < 0.0001$ ), LADA patients ( $P < 0.0001$ ), type 2 diabetic patients ( $P < 0.0001$ ), and healthy subjects ( $P < 0.0001$ ). Similarly, an inverse correlation between  $V\alpha 24^+$   $V\beta 11^+$  T-cell frequency and disease duration was observed in ( $Ab^+$  and  $Ab^-$  combined) classic type 1 diabetes ( $\rho = -0.423$ ;  $P = 0.0002$ ). Thus, irrespective of the positivity of islet-associated autoantibodies, a higher frequency of  $V\alpha 24^+$   $V\beta 11^+$  T-cells was observed in recent-onset classic type 1 diabetes.

To assess whether  $V\alpha 24^+$   $V\beta 11^+$  T-cell frequency was affected by patient age, the frequency was also compared with age. There was a significant difference in age among the four groups (classic type 1 diabetes, LADA, type 2 diabetes, and healthy subjects;  $P < 0.0001$ ). Although there was a tendency for an inverse correlation between  $V\alpha 24^+$   $V\beta 11^+$  T-cell frequency and patient age in  $Ab^+$  and  $Ab^-$  classic type 1 diabetes ( $\rho = -0.294$ ,  $P = 0.0108$ ), multiple linear regression analysis identified disease duration, rather than age, as a significant independent parameter determining the frequency (Table 1). Moreover, although there was a tendency for an inverse correlation between frequency and age in healthy subjects ( $\rho = -0.286$ ), the correlation was very weak and was considered statistically meaningless. In another report (18), there was no correlation between  $V\alpha 24^+$   $V\beta 11^+$  T-cell frequency and age. Accordingly, we believe that we can ignore the effect of age on  $V\alpha 24^+$   $V\beta 11^+$  T-cell frequency in the present study. These results suggest that  $V\alpha 24^+$   $V\beta 11^+$  T-cell frequency may be specifically associated with disease (insulinitis) activity in classic type 1 diabetes.

**CONCLUSIONS**— It has been reported that a numerical and functional deficit of NKT cells (including  $V\alpha 24^+$   $V\beta 11^+$  T-cells in humans) may be associated with the pathogenesis of type 1 diabetes (25,26). On the other hand, we

demonstrated here the striking finding that peripheral  $V\alpha 24^+$   $V\beta 11^+$  T-cells, some of which are considered to be human NKT cells, were significantly increased in Japanese type 1 diabetes, especially in recent-onset classic type 1 diabetes irrespective of islet-associated autoantibody positivity. It seems that our results conflict with the previous reports by Wilson et al. (25) and Kukreja et al. (26). Regarding the report by Wilson et al., a difference in onset age (child or adult) and/or disease duration, neither of which was described in their report (25), could account for the discrepancy between their report and ours, although we cannot exclude the possibility of a difference in genetic background and the definition of NKT cell markers between the two reports. Moreover, they focused on selected subjects, i.e., twin/triplet cases, and NKT cell frequencies in “usual” type 1 diabetic patients and the general population were not compared in their study.

Similarly, regarding the report by Kukreja et al. (26), there is the possibility that a difference in onset age and/or genetic background (Caucasian versus Japanese) could account for the discrepancy between their report and ours. Indeed, the newly diagnosed type 1 diabetic patients reported by Kukreja et al. were very young ( $9.4 \pm 2.16$  years old) compared with our newly diagnosed type 1 diabetic patients ( $35.2 \pm 13.1$  years old). Therefore, at least age should be matched; analysis of children should be done to address this question. Moreover, further assessment of the  $V\alpha 24^+$   $V\beta 11^+$  T-cell population using other useful NKT cell-associated markers and cytokine profile of  $V\alpha 24^+$   $V\beta 11^+$  T-cells are necessary to determine the reason for the discrepancies between their reports and ours.

Although we did not evaluate the cytokine profile of  $V\alpha 24^+$   $V\beta 11^+$  T-cells in the present study, we speculate that increased NKT cells (probably including  $V\alpha 24^+$   $V\beta 11^+$  T-cells), which would have an extreme Th1 phenotype in dia-

betic subjects as shown by Wilson et al. (25), may produce IFN- $\gamma$  upon activation and stimulate diabetogenic lymphocytes to promote the destruction of pancreatic  $\beta$ -cells. On the other hand, considering that NKT cells were originally recognized as regulatory cells, we can also speculate that these cells may be secondarily increased to regulate the progression of recent-onset classic type 1 diabetes. Although measurement of  $V\alpha 24^+$   $V\beta 11^+$  T-cell frequency is believed to be useful as a marker of cellular immunity in type 1 diabetes, further studies are necessary to confirm the significance of increased  $V\alpha 24^+$   $V\beta 11^+$  T-cells in the development of type 1 diabetes.

Recently, we reported a correlation between levels of serum IP-10 (a chemokine that is considered to cause migration of activated Th1-type T-cells to the local lesion) and disease (insulinitis) activity in type 1 diabetes (38). However, there has been no general consensus on a useful marker to assess disease activity of type 1 diabetes thus far. We showed here a high frequency of  $V\alpha 24^+$   $V\beta 11^+$  T-cells in recent-onset classic type 1 diabetes, and the  $V\alpha 24^+$   $V\beta 11^+$  T-cell frequency was inversely correlated with disease duration. These observations raise the possibility that the increased  $V\alpha 24^+$   $V\beta 11^+$  T-cells may reflect active disease (or insulinitis) status in classic type 1 diabetes. To confirm this possibility, it is necessary to assess the relationship between the severity of insulinitis in the human pancreas and  $V\alpha 24^+$   $V\beta 11^+$  T-cell frequency in the peripheral blood of type 1 diabetic patients in a future study. Interestingly, we found no direct correlation between  $V\alpha 24^+$   $V\beta 11^+$  T-cell frequency and serum IP-10 level (data not shown), suggesting that the two factors can be used as independent markers of cellular immunity in type 1 diabetes.

Although we attempted to assess the relationship between  $V\alpha 24^+$   $V\beta 11^+$  T-cell frequency and serum C-peptide, there was no correlation between the two (data not shown). Considering that type 1 diabetes progresses as an inflammatory  $\beta$ -cell dysfunction without actual  $\beta$ -cell destruction until late in the disease process (1), a low level of C-peptide does not necessarily reflect  $\beta$ -cell destruction (or disease [insulinitis] activity), and at times may reflect  $\beta$ -cell dysfunction. Therefore, although no correlation between  $V\alpha 24^+$   $V\beta 11^+$  T-cell frequency and C-peptide was observed in the present study, this

negative finding does not refute our reports on the relationship between Vα24<sup>+</sup> Vβ11<sup>+</sup> T-cell frequency and disease (insulinitis) activity, and rather Vα24<sup>+</sup> Vβ11<sup>+</sup> T-cell frequency may be a useful disease activity marker independent of C-peptide value.

Because there is no report of an increase in Vα24<sup>+</sup> Vβ11<sup>+</sup> T-cells in other autoimmune diseases in humans thus far, we would like to emphasize that a high Vα24<sup>+</sup> Vβ11<sup>+</sup> T-cell (partially including human NKT cell) frequency in peripheral blood is a unique finding in recent-onset classic type 1 diabetes and is not seen in any other autoimmune diseases (18). We observed no increase in the frequency of this subset in patients with other autoimmune diseases such as rheumatoid arthritis or Grave's disease (data not shown). These findings will contribute greatly to understanding the roles of Vα24<sup>+</sup> Vβ11<sup>+</sup> T-cells in autoimmune diseases and to diagnosing and evaluating disease activity in type 1 diabetes.

## References

- Shimada A, Charlton B, Taylor-Edwards C, Fathman CG: Beta-cell destruction may be a late consequence of the autoimmune process in nonobese diabetic mice. *Diabetes* 45:1063–1067, 1996
- Lehuen A, Lantz O, Beaudoin L, Laloux V, Carnaud C, Bendelac A, Bach JF, Monteiro RC: Overexpression of natural killer T cells protects Valpha14-Jalpha281 transgenic nonobese diabetic mice against diabetes. *J Exp Med* 188:1831–1839, 1998
- Lantz O, Bendelac A: An invariant T cell receptor alpha chain is used by a unique subset of major histocompatibility complex class I-specific CD4<sup>+</sup> and CD4<sup>8</sup><sup>+</sup> T cells in mice and humans. *J Exp Med* 180:1097–1106, 1994
- Dellabona P, Casorati G, Friedli B, Angman L, Sallusto F, Tunnacliffe A, Roosneek E, Lanzavecchia A: In vivo persistence of expanded clones specific for bacterial antigens within the human T cell receptor alpha/beta CD4<sup>8</sup><sup>+</sup> subset. *J Exp Med* 177:1763–1771, 1993
- Dellabona P, Padovan E, Casorati G, Brockhaus M, Lanzavecchia A: An invariant V alpha 24-J alpha Q/V beta 11 T cell receptor is expressed in all individuals by clonally expanded CD4<sup>8</sup><sup>+</sup> T cells. *J Exp Med* 180:1171–1176, 1994
- Porcelli S, Yockey CE, Brenner MB, Balk SP: Analysis of T cell antigen receptor (TCR) expression by human peripheral blood CD4<sup>8</sup><sup>+</sup> alpha/beta T cells demonstrates preferential use of several V beta genes and an invariant TCR alpha chain. *J Exp Med* 178:1–16, 1993
- Exley M, Garcia J, Balk SP, Porcelli S: Requirements for CD1d recognition by human invariant Valpha24<sup>+</sup> CD4<sup>8</sup><sup>+</sup> T cells. *J Exp Med* 186:109–120, 1997
- Morita M, Motoki K, Akimoto K, Natori T, Sakai T, Sawa E, Yamaji K, Koezuka Y, Kobayashi E, Fukushima H: Structure-activity relationship of alpha-galactosylceramides against B16-bearing mice. *J Med Chem* 38:2176–2187, 1995
- Kobayashi E, Motoki K, Uchida T, Fukushima H, Koezuka Y: KRN7000, a novel immunomodulator, and its antitumor activities. *Oncol Res* 7:529–534, 1995
- Hong S, Scherer DC, Singh N, Mendiratta SK, Serizawa I, Koezuka Y, Van Kaer L: Lipid antigen presentation in the immune system: lessons learned from CD1d knockout mice. *Immunol Rev* 169:31–44, 1999
- Kawano T, Cui J, Koezuka Y, Toura I, Kaneko Y, Motoki K, Ueno H, Nakagawa R, Sato H, Kondo E, Koseki H, Taniguchi M: CD1d-restricted and TCR-mediated activation of valpha14 NKT cells by glycosylceramides. *Science* 278:1626–1629, 1997
- Burdin N, Brossay L, Koezuka Y, Smiley ST, Grusby MJ, Gui M, Taniguchi M, Hayakawa K, Kronenberg M: Selective ability of mouse CD1 to present glycolipids: alpha-galactosylceramide specifically stimulates V alpha 14<sup>+</sup> NK T lymphocytes. *J Immunol* 161:3271–3281, 1998
- Chen H, Paul WE: Cultured NK1.1<sup>+</sup> CD4<sup>+</sup> T cells produce large amounts of IL-4 and IFN-gamma upon activation by anti-CD3 or CD1. *J Immunol* 159:2240–2249, 1997
- Yoshimoto T, Paul WE: CD4pos, NK1.1pos T cells promptly produce interleukin 4 in response to in vivo challenge with anti-CD3. *J Exp Med* 179:1285–1295, 1994
- Yoshimoto T, Bendelac A, Hu-Li J, Paul WE: Defective IgE production by SJL mice is linked to the absence of CD4<sup>+</sup>, NK1.1<sup>+</sup> T cells that promptly produce interleukin 4. *Proc Natl Acad Sci U S A* 92:11931–11934, 1995
- Mieza MA, Itoh T, Cui JQ, Makino Y, Kawano T, Tsuchida K, Koike T, Shirai T, Yagita H, Matsuzawa A, Koseki H, Taniguchi M: Selective reduction of V alpha 14<sup>+</sup> NK T cells associated with disease development in autoimmune-prone mice. *J Immunol* 156:4035–4040, 1996
- Sumida T, Sakamoto A, Murata H, Makino Y, Takahashi H, Yoshida S, Nishioka K, Iwamoto I, Taniguchi M: Selective reduction of T cells bearing invariant V alpha 24J alpha Q antigen receptor in patients with systemic sclerosis. *J Exp Med* 182:1163–1168, 1995
- van der Vliet HJ, von Blomberg BM, Nishi N, Reijm M, Voskuyl AE, van Bodegraven AA, Polman CH, Rustemeyer T, Lips P, van den Eertwegh AJ, Giaccone G, Scheper RJ, Pinedo HM: Circulating V(alpha24<sup>+</sup>) Vbeta11<sup>+</sup> NKT cell numbers are decreased in a wide variety of diseases that are characterized by autoreactive tissue damage. *Clin Immunol* 100:144–148, 2001
- Sumida T, Maeda T, Taniguchi M, Nishioka K, Stohl W: TCR AV24 gene expression in double negative T cells in systemic lupus erythematosus. *Lupus* 7:565–568, 1998
- Yanagihara Y, Shiozawa K, Takai M, Kyogoku M, Shiozawa S: Natural killer (NK) T cells are significantly decreased in the peripheral blood of patients with rheumatoid arthritis (RA). *Clin Exp Immunol* 118:131–136, 1999
- Godfrey DI, Kinder SJ, Silvera P, Baxter AG: Flow cytometric study of T cell development in NOD mice reveals a deficiency in alphabetaTCR<sup>+</sup>CD4<sup>8</sup><sup>+</sup> thymocytes. *J Autoimmun* 10:279–285, 1997
- Gombert JM, Herbelin A, Tancrede-Bohin E, Dy M, Carnaud C, Bach JF: Early quantitative and functional deficiency of NK1<sup>+</sup>-like thymocytes in the NOD mouse. *Eur J Immunol* 26:2989–2998, 1996
- Rapoport MJ, Jaramillo A, Zipris D, Lazarus AH, Serreze DV, Leiter EH, Cyopick P, Danska JS, Delovitch TL: Interleukin 4 reverses T cell proliferative unresponsiveness and prevents the onset of diabetes in nonobese diabetic mice. *J Exp Med* 178:87–99, 1993
- Hammond KJ, Poulton LD, Palmisano LJ, Silveira PA, Godfrey DI, Baxter AG: alpha/beta-T cell receptor (TCR)<sup>+</sup>CD4<sup>8</sup><sup>+</sup> (NKT) thymocytes prevent insulin-dependent diabetes mellitus in nonobese diabetic (NOD)/Lt mice by the influence of interleukin (IL)-4 and/or IL-10. *J Exp Med* 187:1047–1056, 1998
- Wilson SB, Kent SC, Patton KT, Orban T, Jackson RA, Exley M, Porcelli S, Schatz DA, Atkinson MA, Balk SP, Strominger JL, Hafler DA: Extreme Th1 bias of invariant Valpha24JalphaQ T cells in type 1 diabetes. *Nature* 391:177–181, 1998
- Kukreja A, Cost G, Marker J, Zhang C, Sun Z, Lin-Su K, Ten S, Sanz M, Exley M, Wilson B, Porcelli S, Maclaren N: Multiple immuno-regulatory defects in type-1 diabetes. *J Clin Invest* 109:131–140, 2002
- Zimmet PZ, Tuomi T, Mackay IR, Rowley MJ, Knowles W, Cohen M, Lang DA: Latent autoimmune diabetes mellitus in adults (LADA): the role of antibodies to glutamic acid decarboxylase in diagnosis and prediction of insulin dependency. *Diabet Med* 11:299–303, 1994
- Expert Committee on the Diagnosis and Classification of Diabetes Mellitus: Report of the Expert Committee on the Diagnosis

- and Classification of Diabetes Mellitus. *Diabetes Care* 20:1183–1197, 1997
29. Alberti KG, Zimmet PZ: Definition, diagnosis and classification of diabetes mellitus and its complications. Part 1: diagnosis and classification of diabetes mellitus provisional report of a WHO consultation. *Diabet Med* 15:539–553, 1998
  30. Kasuga A, Maruyama T, Nakamoto S, Ozawa Y, Suzuki Y, Saruta T: High-titer autoantibodies against glutamic acid decarboxylase plus autoantibodies against insulin and IA-2 predicts insulin requirement in adult diabetic patients. *J Autoimmun* 12:131–135, 1999
  31. Porcelli S, Gerdes D, Fertig AM, Balk SP: Human T cells expressing an invariant V alpha 24-J alpha Q TCR alpha are CD4<sup>+</sup> and heterogeneous with respect to TCR beta expression. *Hum Immunol* 48:63–67, 1996
  32. Poulton LD, Baxter AG: Clinical application of NKT cell assays to the prediction of type 1 diabetes. *Diabete Metab Res Rev* 17: 429–435, 2001
  33. van Der Vliet HJ, von Blomberg BM, Hazenberg MD, Nishi N, Otto SA, van Benthem BH, Prins M, Claessen FA, van Den Eertwegh AJ, Giaccone G, Miedema F, Scheper RJ, Pinedo HM: Selective decrease in circulating Valpha24(+)Vbeta11(+) NKT cells during HIV type 1 infection. *J Immunol* 168:1490–1495, 2002
  34. Kusunoki Y, Hirai Y, Kyoizumi S, Akiyama M: Evidence for in vivo clonal proliferation of unique population of blood CD4<sup>+</sup>/CD8<sup>+</sup> T cells bearing T-cell receptor alpha and beta chains in two normal men. *Blood* 79:2965–2972, 1992
  35. Nishi N, van der Vliet HJ, Koezuka Y, von Blomberg BM, Scheper RJ, Pinedo HM, Giaccone G: Synergistic effect of KRN7000 with interleukin-15, -7, and -2 on the expansion of human V alpha 24<sup>+</sup>V beta 11<sup>+</sup> T cells in vitro. *Hum Immunol* 61:357–365, 2000
  36. van Der Vliet HJ: Effects of alpha-galactosylceramide (KRN7000), interleukin-12 and interleukin-7 on phenotype and cytokine profile of human Valpha24<sup>+</sup> Vbeta11<sup>+</sup> T-cells. *Immunology* 98:557–563, 1999
  37. van der Vliet HJ: Potent expansion of human natural killer T cells using alpha-galactosylceramide (KRN7000)-loaded monocyte-derived dendritic cells, cultured in the presence of IL-7 and IL-15. *J Immunol Methods* 247:61–72, 2001
  38. Shimada A, Morimoto J, Kodama K, Suzuki R, Oikawa Y, Funae O, Kasuga A, Saruta T, Narumi S: Elevated serum IP-10 levels observed in type 1 diabetes. *Diabetes Care* 24:510–515, 2001
